# Supplementary material
Source: PubMed Central journal article supplement (PMC2630430)
Supplement: tpc.108.063727_1.pdf [file tpc.108.063727_1.pdf]

**Supplemental Data. Ammiraju et al. (2008). Dynamic Evolution of *Oryza* Genomes Is Revealed by Comparative Genomic Analysis of a Genus-wide Vertical Dataset**

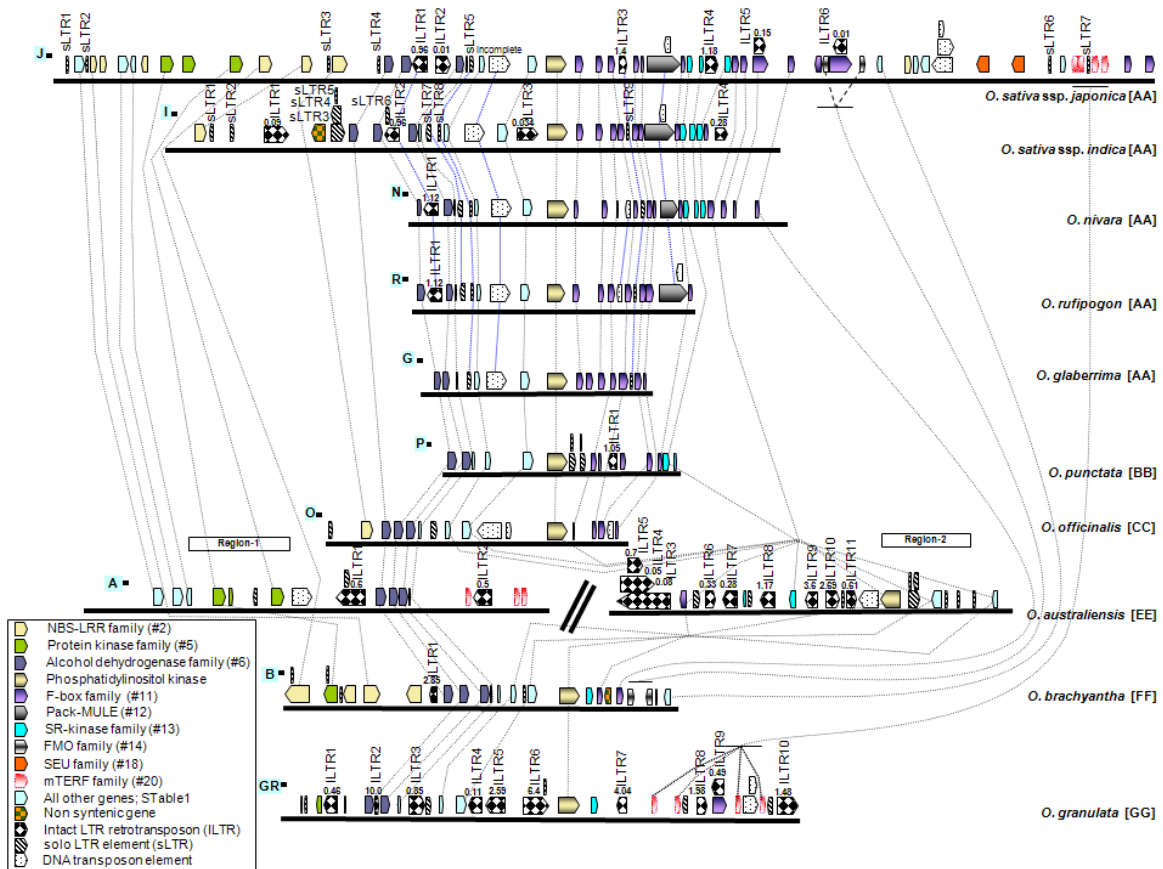

**Supplemental Figure 1.** Phylogenomic View of the Genus-wide *Adh1* Vertical Sequence Dataset Depicting Both Gene and Transposon Dynamics. TEs larger than 3 Kb are shown with the exception of all intact (represented as ILTR) and solo LTR (sLTR) retrotransposons. Insertion time (in million years ago) was indicated above each ILTR. Orthologous TEs are highlighted in blue connectors.

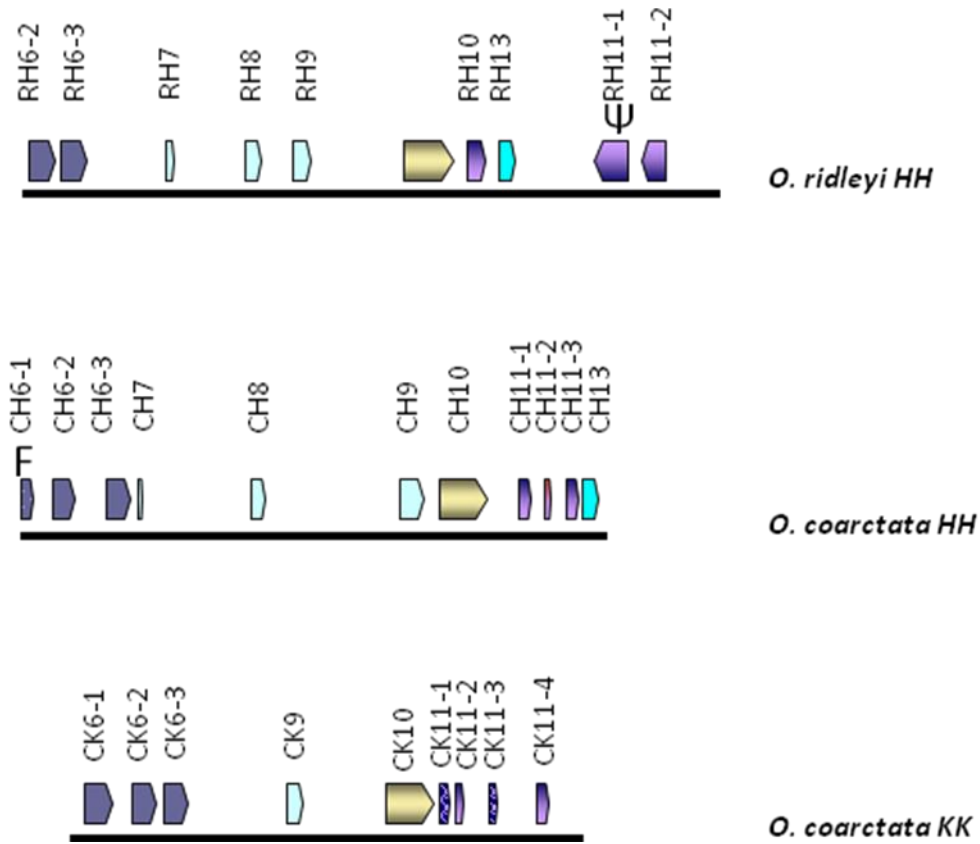

**Supplemental Figure 2.** Figure Showing The Presence of F-box Gene Family (gene family #11) In The Polyploid *Oryza* Species At The Orthologous *Adh1* Regions. Genes from each *O. coarctata* [HHKK] sub-genomes are denoted by CH and CK, and HH sub-genome from *O. ridleyi* are denoted by RI. F indicates fragment. Gene numbering is in accordance with Figure 1.

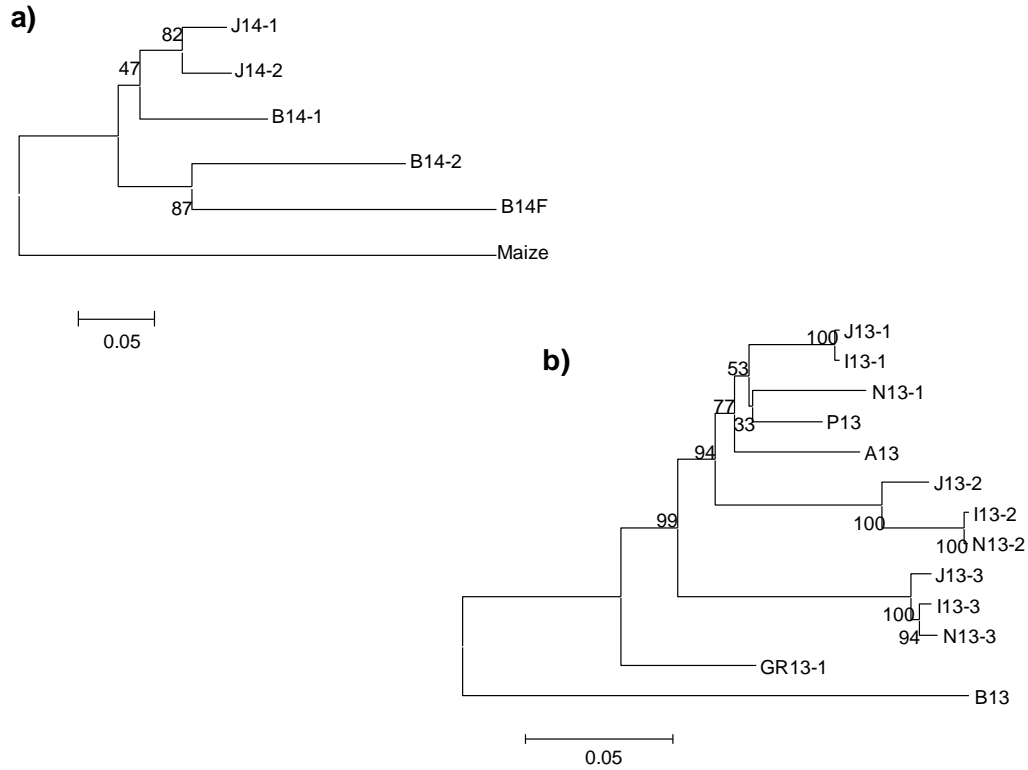

**Supplemental Figure 3.** Evolutionary Dynamics of Different Gene Families in Their Orthologous Regions. **a)** Phylogenetic relationships of gene family 14; **b)** Phylogenetic relationships of gene family 13; **c)** Phylogenetic relationships of gene family 5; **d)** Phylogenetic relationships of gene family 2; **e)** Phylogenetic relationships of gene family 2: *japonica* and *O. brachyantha* comparison; **f)** Phylogenetic relationships of gene family 20.

Supplemental Figure 3. Contd

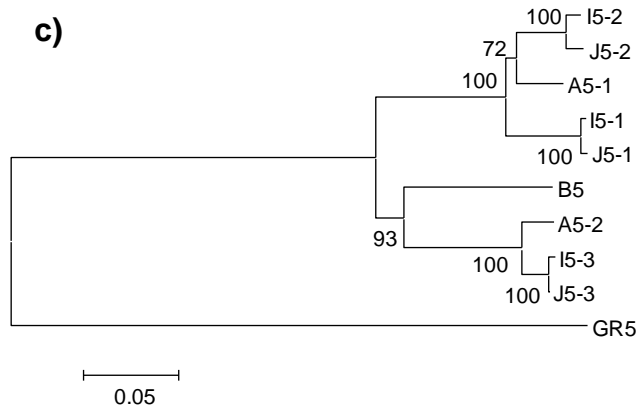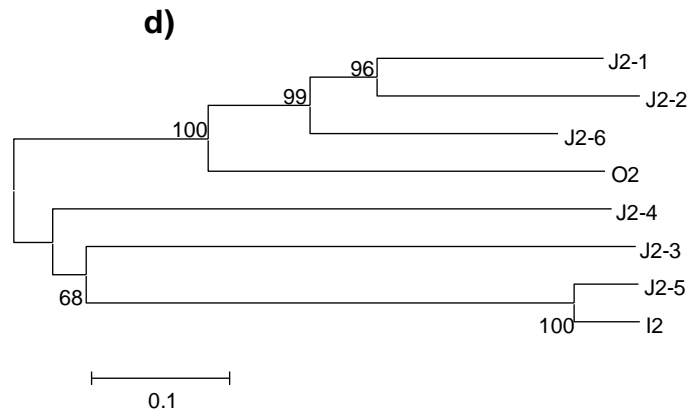

Supplemental Figure 3. Contd

e)

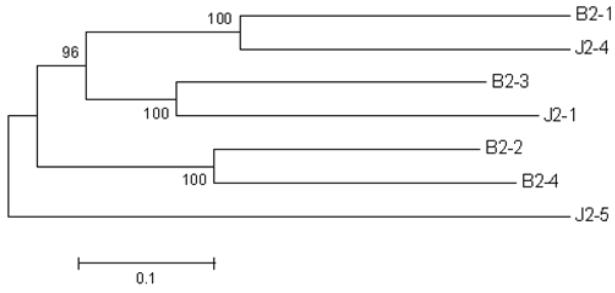

f)

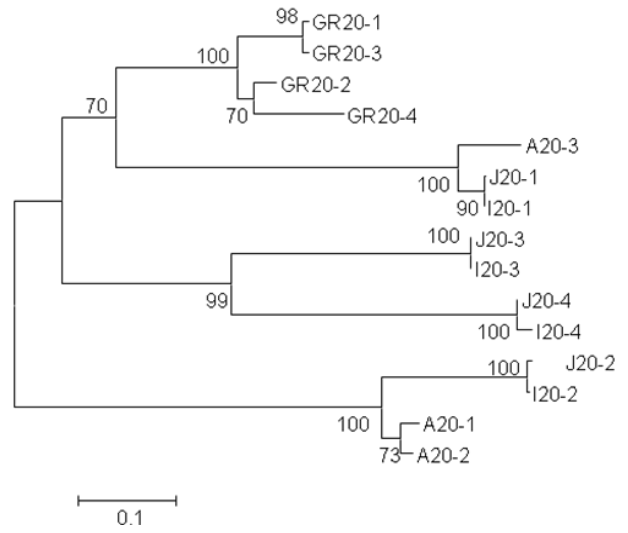

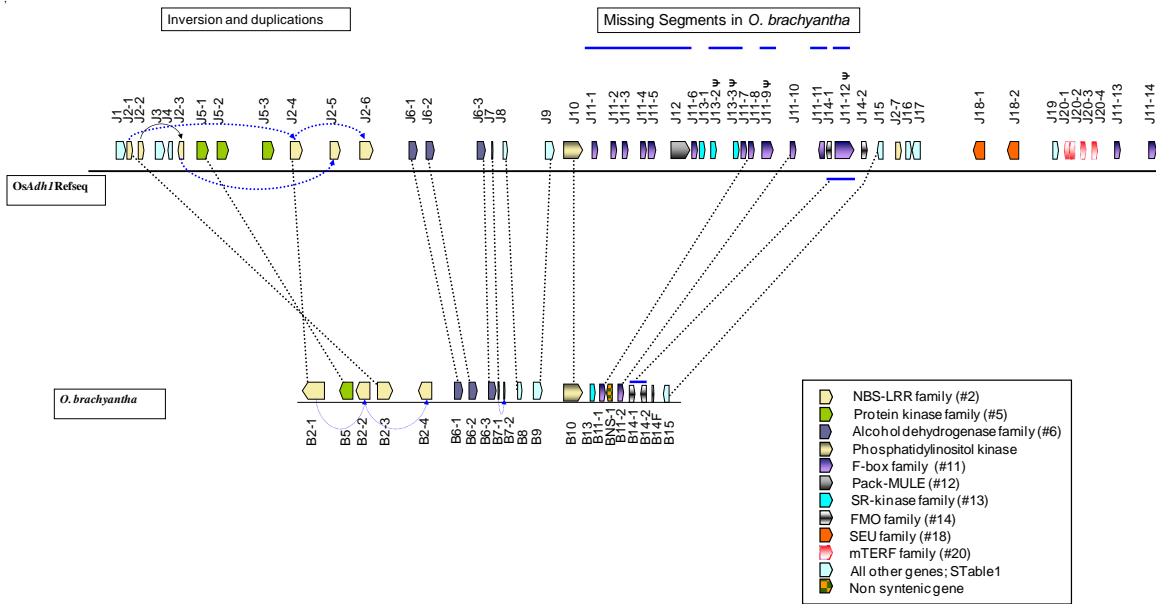

**Supplemental Figure 4.** Complex Rearrangements in *O. brachyantha* [FF] relative to the *OsAdh1Refseq*.

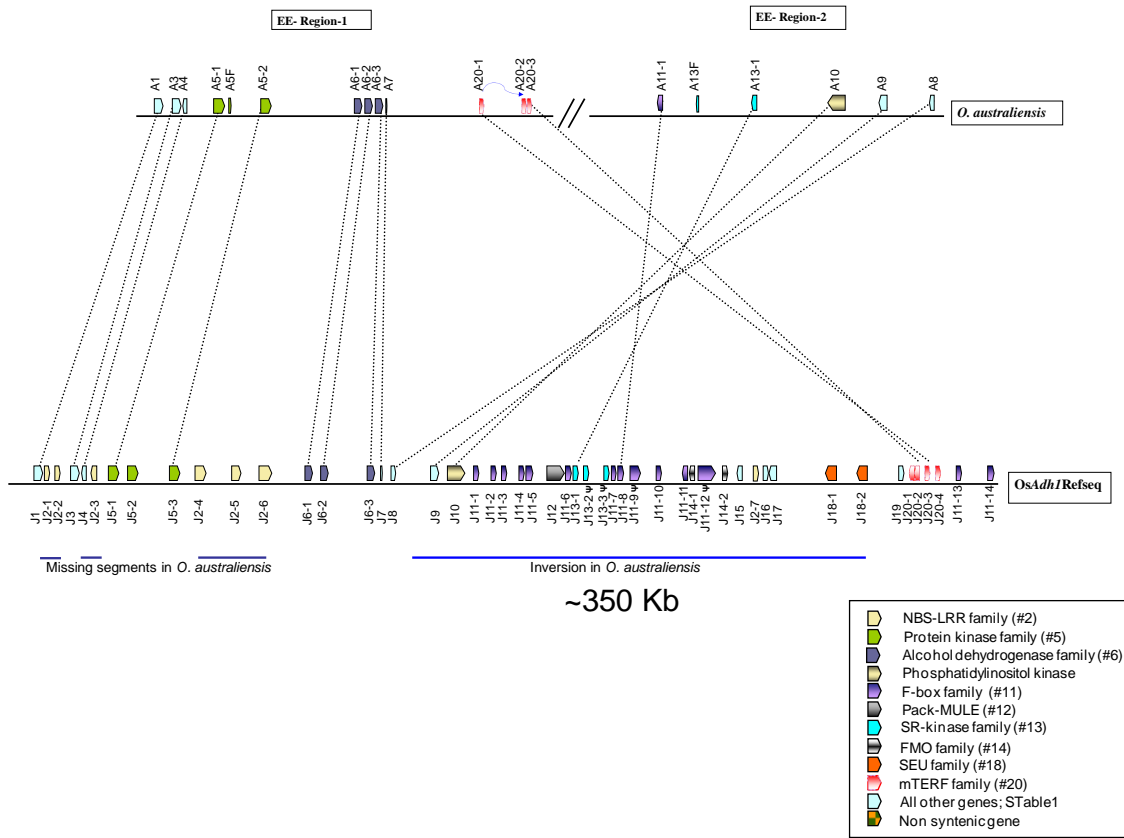

**Supplemental Figure 5.** Putative Inversion in *O. australiensis* [EE] Relative to the *OsAdh1RefSeq*.





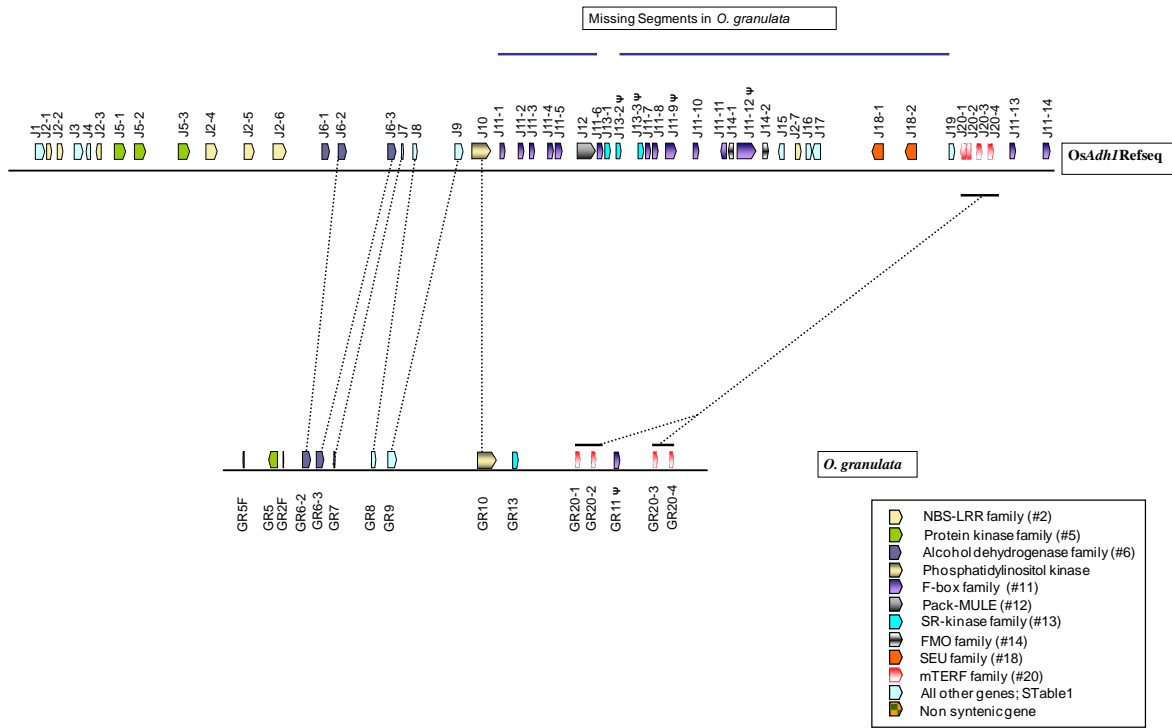

**Supplemental Figure 7.** Large Rearrangement in *O. granulata* [GG] Relative to the *OsAdh1*Refseq.

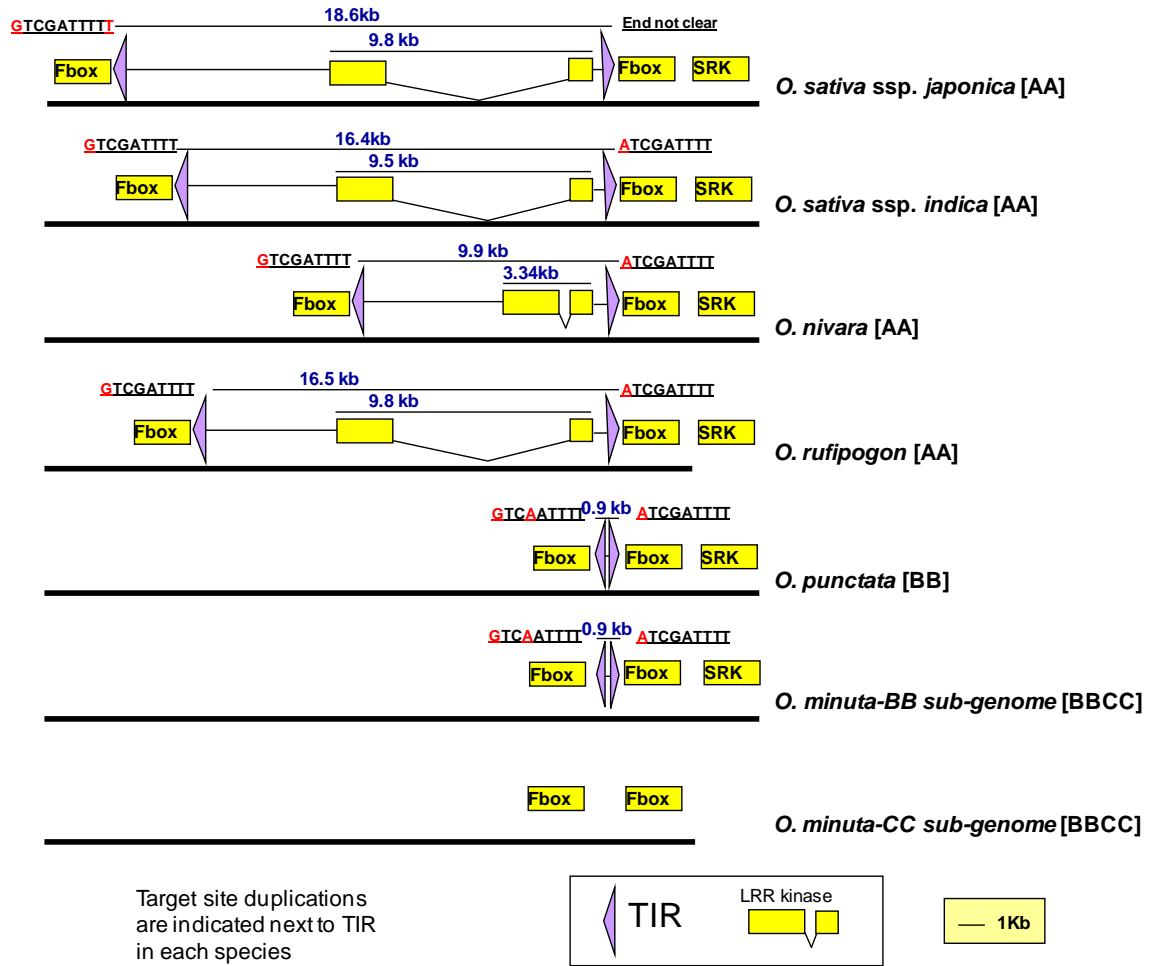

**Supplemental Figure 8.** Pack-MULE Mediated Gene Movement/Acquisition in the AA Genome Lineages.

**Supplemental Table 1.** List of Genes in the *OsAdh1* Refseq.

| Gene# | Classification | Putative gene product    | Identification method |                                                                                          |                         |                                                   | TIGR Rice model V5              |
|-------|----------------|--------------------------|-----------------------|------------------------------------------------------------------------------------------|-------------------------|---------------------------------------------------|---------------------------------|
|       |                |                          | Transcript evidence   |                                                                                          | Known functional domain |                                                   |                                 |
|       |                |                          | EST                   | FI-cDNA                                                                                  | accession#              | domain name                                       |                                 |
| 1     | Expressed      | UP1 protease family      | TC316418              | gi 32968360 dbj AK058342.1                                                               | COG5160                 | Protease, Ulp1 family                             | LOC_Os11g10780                  |
| 2-1   | Expressed      | NBS LRR-1                | TC314273              | gi 32974139 dbj AK064121.1                                                               | PF00931                 | NB-ARC domain                                     | LOC_Os11g10770                  |
| 2-2   | Expressed      | NBS-LRR-2                | TC309960              | NONE                                                                                     | PF00560                 | Leucine Rich Repeat                               | LOC_Os11g10760                  |
| 3     | Expressed      | serine carboxy peptidase | NONE                  | gi 32988670 dbj AK103461.1                                                               | PF00450                 | serine carboxypeptidase                           | LOC_Os11g10750                  |
| 4     | Hypothetical   | tetratricopeptide        | NONE                  | NONE                                                                                     | TIGR00756/PF01535       | pentatricopeptide repeat domain                   | LOC_Os11g10740                  |
| 2-3   | Hypothetical   | LRR -3                   | NONE                  | NONE                                                                                     | PF00560                 | Leucine Rich Repeat (2repeats)                    | LOC_Os11g10720                  |
| 5-1   | Expressed      | protein kinase domain-1  | TC331261              | NONE                                                                                     | PF00069/PF00400         | protein kinase domain/WD domain, G-beta repeat    | LOC_Os11g10710                  |
| 5-2   | Expressed      | protein kinase domain-2  | TC316203              | NONE                                                                                     | PF00069/PF07714         | protein kinase domain/Protein tyrosine kinase /   | LOC_Os11g10690 + LOC_Os11g10680 |
| 5-3   | Hypothetical   | protein kinase-3         | NONE                  | NONE                                                                                     | PF00069/PF00400         | protein kinase domain/WD domain, G-beta repeat/   | LOC_Os11g10640                  |
| 2-4   | Hypothetical   | NBS-LRR-4                | NONE                  | NONE                                                                                     | PF00931/PF00560         | NB-ARC domain/Leucine Rich Repeat                 | LOC_Os11g10610 + LOC_Os11g10620 |
| 2-5   | Expressed      | NBS-LRR-_5               | CF196923              | NONE                                                                                     | PF00560                 | Leucine Rich Repeat                               | LOC_Os11g10570                  |
| 2-6   | Expressed      | NBS-LRR-6                | NONE                  | gi 32982196 dbj AK072173.1 <br>gi 32969144 dbj AK059126.1 <br>gi 32969144 dbj AK059126.1 | PF00560/PF00931         | NB-ARC domain /Leucine Rich Repeat/               | LOC_Os11g10550                  |
| 6-1   | Expressed      | Adh3                     | TC311799              | gi 32986497 dbj AK101288.1                                                               | PF00107                 | oxidoreductase, zinc-binding dehydrogenase family | LOC_Os11g10520                  |
| 6-2   | Expressed      | Adh2                     | TC294581              | gi 32988008 dbj AK102799.1                                                               | PF00107                 | oxidoreductase, zinc-binding dehydrogenase family | LOC_Os11g10510                  |
| 6-3   | Expressed      | Adh1                     | TC318729              | gi 32979354 dbj AK069330.1                                                               | PF00107                 | oxidoreductase, zinc-binding dehydrogenase family | LOC_Os11g10480                  |

**Supplemental Table 1. Contd**

| Gene# | Classification | Putative gene product           | Identification method |                            |                             |                                                                             | TIGR Rice model V5                    |
|-------|----------------|---------------------------------|-----------------------|----------------------------|-----------------------------|-----------------------------------------------------------------------------|---------------------------------------|
|       |                |                                 | Transcript evidence   |                            | Known functional domain     |                                                                             |                                       |
|       |                |                                 | EST                   | FI-cDNA                    | accession#                  | domain name                                                                 |                                       |
| 7     | Expressed      | RZ53                            | TC310740              | NONE                       | NONE                        | NONE                                                                        | LOC_Os11g10470                        |
| 8     | Expressed      | Peroxidase                      | TC313637              | NONE                       | PF00141                     | Peroxidase                                                                  | LOC_Os11g10460                        |
| 9     | Hypothetical   | NifS                            | NONE                  | NONE                       | PF00266                     | aminotransferase, class V                                                   | LOC_Os11g10430                        |
| 10    | Expressed      | 1-phosphatidylinositol 4-kinase | TC316980              | gi 32983758 dbj AK073735.1 | PF00357                     | Integrin alpha cytoplasmic region                                           | LOC_Os11g10420                        |
| 11-1  | Expressed      | Fbox-1                          | TC342142              | NONE                       | PF00646                     | F-box domain                                                                | LOC_Os11g10400                        |
| 11-2  | Expressed      | Fbox-2                          | TC355497              | NONE                       | PF00647                     | F-box domain                                                                | LOC_Os11g10384                        |
| 11-3  | Expressed      | Fbox-3                          | NP176576              | NONE                       | PF00646                     | F-box domain                                                                | LOC_Os11g10370                        |
| 11-4  | Expressed      | Fbox-4                          | TC291291              | gi 32992111 dbj AK106902.1 | PF00646                     | F-box domain                                                                | LOC_Os11g10340                        |
| 11-5  | Hypothetical   | Fbox-5                          | NONE                  | NONE                       | PF00647                     | F-box domain                                                                | LOC_Os11g10330                        |
| 12    | Expressed      | LRRkinase/PACKM ULE             | NONE                  | gi 32985249 dbj AK111797.1 | PF00560/PF00069             | Leucine Rich Repeat/protein kinase domain                                   | LOC_Os11g10310                        |
| 11-6  | Expressed      | Fbox-6                          | NP176582              | NONE                       | PF00647                     | F-box domain                                                                | LOC_Os11g10300                        |
| 13-1  | Expressed      | SRK kinase-1                    | TC305271              | NONE                       | PF01453/PF00954             | D-mannose binding lectin/S-locus glycoprotein family                        | LOC_Os11g10290                        |
| 13-2  | Psuedo         | SRKkinase-2                     | NONE                  | NONE                       | PF00069/<br>PF01453/PF00954 | protein kinase domain /D-mannose binding lectin/S-locus glycoprotein family | LOC_Os11g10280                        |
| 13-3  | Psuedo         | SRKkinase-3                     | NONE                  | NONE                       | PF00069/PF01453/<br>PF00954 | protein kinase domain/D-mannose binding lectin/S-locus glycoprotein family  | LOC_Os11g10260                        |
| 11-7  | Expressed      | Fbox-7                          | TC321228              | gi 32991667 dbj AK106458.1 | NONE                        | NONE                                                                        | LOC_Os11g10250                        |
| 11-8  | Expressed      | Fbox-8                          | TC305667              | gi 32977905 dbj AK067887.1 | PF00646                     | F-box domain                                                                | LOC_Os11g10240                        |
| 11-9  | Psuedo         | Fbox-9                          | NONE                  | NONE                       | NONE                        | NONE                                                                        | LOC_Os11g10230<br>+<br>LOC_Os11g10220 |
| 11-10 | Expressed      | Fbox-10                         | TC317227              | NONE                       | PF00646                     | F-box domain                                                                | LOC_Os11g10200                        |

**Supplemental Table 1. Contd**

| Gene# | Classification     | Putative gene product | Identification method                |                                                                |                         |                                               | TIGR Rice model V5 |
|-------|--------------------|-----------------------|--------------------------------------|----------------------------------------------------------------|-------------------------|-----------------------------------------------|--------------------|
|       |                    |                       | Transcript evidence                  |                                                                | Known functional domain |                                               |                    |
|       |                    |                       | EST                                  | FI-cDNA                                                        | accession#              | domain name                                   |                    |
| 11-11 | Expressed          | Fbox-11               | TC291677                             | gi 37988956 dbj AK119333.1 <br>;<br>gi 32995027 dbj AK109818.1 | PF00646                 | F-box domain                                  | LOC_Os11g10180     |
| 14-1  | Expressed          | FMO-1                 | NP176587                             | NONE                                                           | PF00744                 | FMO-like flavin-binding monooxygenase.        | LOC_Os11g10170     |
| 11-12 | Pseudo             | Fbox-12-pseudo        | TC310614 ;<br>CK012051 ;<br>CA765367 | NONE                                                           | NONE                    | NONE                                          | LOC_Os11g10160     |
| 14-2  | Hypothetical       | FMO-2                 | NONE                                 | NONE                                                           | PF00743                 | FMO-like flavin-binding monooxygenase.        | LOC_Os11g10140     |
| 15    | Hypothetical       | Myb                   | NONE                                 | NONE                                                           | PF00249                 | Myb-like DNA-binding domain                   | LOC_Os11g10130     |
| 2-7   | Expressed          | NBS-LRR-7             | TC300544                             | gi 32976100 dbj AK066082.1                                     | PF00931                 | NB-ARC domain                                 | LOC_Os11g10120     |
| 16    | Expressed, unknown | unknown               | TC317117                             | NONE                                                           | none                    | has EST and Arabidopsis protein homolog       | LOC_Os11g10110     |
| 17    | Expressed          | MAPKinase             | TC299118                             | gi 37989913 dbj AK120290.1                                     | PF00069/PF07714         | protein kinase domain/Protein tyrosine kinase | LOC_Os11g10100     |
| 18-1  | Expressed          | SEU3A                 | TC303603 ;<br>TC358935               | NONE                                                           | NONE                    | NONE                                          | LOC_Os11g10070     |
| 18-2  | Expressed          | SEU3B                 | NONE                                 | gi 32972092 dbj AK062074.1                                     | NONE                    | NONE                                          | LOC_Os11g10060     |
| 19    | Hypothetical       | alpha-G-protein       | NONE                                 | NONE                                                           | PF00503                 | G-protein alpha subunit                       | LOC_Os11g10050     |
| 20-1  | Expressed          | mTRF-1                | TC288935                             | gi 32979988 dbj AK069964.1                                     | PF02536                 | mTERF                                         | LOC_Os11g10040     |
| 20-2  | Expressed          | mTRF-2                | TC315166                             | gi 37991445 dbj AK121822.1                                     | PF02536                 | mTERF                                         | LOC_Os11g10020     |
| 20-3  | Expressed          | mTRF-3                | TC291747                             | gi 32974188 dbj AK064170.1                                     | PF02536                 | mTERF                                         | LOC_Os11g10000     |
| 20-4  | Expressed          | mTRF-4                | TC290677                             | gi 32986082 dbj AK100873.1                                     | PF02536                 | mTERF                                         | LOC_Os11g09990     |
| 11-13 | Expressed          | Fbox-13               | NP1431302                            | NONE                                                           | PF00646                 | F-box domain                                  | LOC_Os11g09970     |
| 11-14 | Hypothetical       | Fbox -14              | NONE                                 | NONE                                                           | NONE                    | NONE                                          | LOC_Os11g09960     |

**Supplemental Table 2.** Previously Identified Putative Gene Models from the *OsAdh1* Refseq that were Omitted from the Comparative Analysis.

| Number | Gene model     | classification | Cause for omission                                                                                                                                         |
|--------|----------------|----------------|------------------------------------------------------------------------------------------------------------------------------------------------------------|
| 1      | LOC_Os11g10670 | Hypothetical   | No homolog outside <i>Oryza</i> ; No conservation across <i>Adh1</i> vertical dataset; No conserved functional domain                                      |
| 2      | LOC_Os11g10650 | Hypothetical   | No homolog outside <i>Oryza</i> ; No conservation across <i>Adh1</i> vertical dataset; No conserved functional domain                                      |
| 3      | LOC_Os11g10600 | Hypothetical   | TE (SC-3) fragment                                                                                                                                         |
| 4      | LOC_Os11g10560 | Hypothetical   | MULE like TE fragment:<br>No conserved functional domain                                                                                                   |
| 5      | LOC_Os11g10540 | Expressed      | No homolog outside <i>Oryza</i> ; No conservation across <i>Adh1</i> vertical dataset; No conserved functional domain. Possible gene fragment              |
| 6      | LOC_Os11g10530 | Expressed      | No homolog outside <i>Oryza</i> ; No conservation across <i>Adh1</i> vertical dataset; No conserved functional domain. Possible gene fragment              |
| 7      | LOC_Os11g10434 | Expressed      | Appears fragment; No intact ORFs.<br>No conservation across <i>Adh1</i> vertical dataset; No conserved domain                                              |
| 8      | LOC_Os11g10350 | Conserved      | Ty1-copia-like fragment                                                                                                                                    |
| 9      | LOC_Os11g10320 | Expressed      | Embedded within a Pack-MULE (J12)<br>No homolog outside <i>Oryza</i> ; No conservation across <i>Adh1</i> vertical dataset; No conserved functional domain |
| 10     | LOC_Os11g10210 | Hypothetical   | TE: MULE (Os0177-RC1633)                                                                                                                                   |
| 11     | LOC_Os11g10080 | Hypothetical   | No homolog outside <i>Oryza</i> ; No conservation across <i>Adh1</i> vertical dataset; No conserved functional domain<br>TE                                |
| 12     | LOC_Os11g10010 | Hypothetical   | No homolog outside <i>Oryza</i> ; No conservation across <i>Adh1</i> vertical dataset; No conserved functional domain                                      |

**Supplemental Table 3.** Previously Identified Gene Models that were Corrected in this Study.

| Number | Gene model     | classification | Cause for correction                                                                                                                                                                                                                                                                                |
|--------|----------------|----------------|-----------------------------------------------------------------------------------------------------------------------------------------------------------------------------------------------------------------------------------------------------------------------------------------------------|
| 1      | LOC_Os11g10384 | TE             | This predicted TE model also integrated an F-box family gene (11-2) from this region. This gene is phylogenetically similar to other genes in this region.                                                                                                                                          |
| 2      | LOC_Os11g10260 | TE             | This predicted TE model also integrated an S-receptor kinase family member (13-3) from this region. This gene (pseudo) is phylogenetically similar to other genes in this region (LOC_Os11g10290 and LOC_Os11g10280; gene sequence AF172282.20; Tarchini et al, 2000).                              |
| 3      | LOC_Os11g10230 | TE             | The two TEs are actually a single LTR retrotransposon with intact target site duplications, and inserted within the merged gene model - LOC_Os11g10230 + LOC_Os11g10220. This resulted in a pseudo gene (F-box gene family (11-9 $\psi$ ) The actual gene sequence is AF172282.23; Tarchini, 2000). |
|        | LOC_Os11g10220 | TE             |                                                                                                                                                                                                                                                                                                     |
| 4      | LOC_Os11g10690 | Expressed      | These two gene models were merged on F1-cDNA evidence and the structure of other members of this family (i.e. LOC_Os11g10710 and LOC_Os11g10640) in <i>Adh</i> /RefSeq and the genus-wide vertical sequence dataset.                                                                                |
|        | LOC_Os11g10680 | Expressed      |                                                                                                                                                                                                                                                                                                     |
| 5      | LOC_Os11g10620 | Expressed      | These two gene models were merged based on the structure of paralogous members of other genes in this region (eg: LOC_Os11g10550).                                                                                                                                                                  |
|        | LOC_Os11g10610 | Expressed      |                                                                                                                                                                                                                                                                                                     |

**Supplemental Table 4.** Total Number of Genes (Intact, Pseudo, TE Embedded, and Gene Fragments) Identified in the *Adh1* Genus-wide Vertical Sequence Dataset.

| Species                              | Genome type | Intact            | Pseudo <sup>3***</sup> | TE embedded | Fragment <sup>****</sup> |
|--------------------------------------|-------------|-------------------|------------------------|-------------|--------------------------|
| <i>O. sativa ssp japonica</i>        | AA          | 45                | 4                      | 12          |                          |
| <i>O. sativa ssp indica</i>          | AA          | 18                | 2                      | 2           |                          |
| <i>O. nivara</i>                     | AA          | 19                | 1                      | 2           |                          |
| <i>O. rufipogon</i>                  | AA          | 12                | 1                      | 1           |                          |
| <i>O. glaberrima</i>                 | AA          | 12                | 1                      | 1           |                          |
| <i>O. punctata</i>                   | BB          | 11                | 1                      |             | 1                        |
| <i>O. officinalis</i>                | CC          | 11                | 1                      | 1           |                          |
| <i>O. australiensis</i> <sup>*</sup> | EE          | 17                |                        |             | 2                        |
| <i>O. brachyantha</i>                | FF          | 20                |                        |             | 1                        |
| <i>O. granulata</i>                  | GG          | 12                | 3                      | 1           | 1                        |
| Total                                |             | 178 <sup>**</sup> | 14                     | 82          | 5                        |

\* From both *O. australiensis* BACs

\*\*Pack-MULE carried a full-length cDNA supported gene similar to the *Xa21* gene, therefore it was included in the total gene count.

\*\*\*Pseudo genes contain frameshift mutations resulting in premature stop codons and/or contain TE insertions.

\*\*\*\*Fragments are sequences that have significant homology to known genes in the *Adh1* region, but only have partial coverage of the parental genes without a clear beginning or end.



**Supplemental Table 5.** Synonymous (Ks) and Nonsynonymous (Ka) Values for Six Core Genes Spanning the *Adh1* Genus-wide Vertical Sequence Dataset.

| <i>Gene</i>                     | <b>Species and genome type</b> | <b>Ks</b> | <b>Ka</b> | <b>Ka/Ks</b> | <b>Divergence time (MYA)*</b> |
|---------------------------------|--------------------------------|-----------|-----------|--------------|-------------------------------|
| <i>Adh1_japonica</i> (J6-3)     | <i>O. sativa_indica_AA</i>     | 0         | 0         | 0            | 0                             |
|                                 | <i>O. nivara_AA</i>            | 0         | 0         | 0            | 0                             |
|                                 | <i>O. rufipogon_AA</i>         | 0         | 0         | 0            | 0                             |
|                                 | <i>O. glaberrima_AA</i>        | 0.0038    | 0         | 0            | 0.3                           |
|                                 | <i>O. punctata_BB</i>          | 0.1049    | 0.0023    | 0.02         | 8.1                           |
|                                 | <i>O. officinalis_CC</i>       | 0.1451    | 0.0023    | 0.02         | 11.2                          |
|                                 | <i>O. australiensis_EE</i>     | 0.1409    | 0.0058    | 0.04         | 10.8                          |
|                                 | <i>O. brachyantha_FF</i>       | 0.2018    | 0.0069    | 0.03         | 15.5                          |
|                                 | <i>O. granulata_GG</i>         | 0.2216    | 0.0092    | 0.04         | 17                            |
| <i>Adh2_japonica</i> (J6-2)     | <i>O. sativa_indica_AA</i>     | 0         | 0         | 0            | 0                             |
|                                 | <i>O. nivara_AA</i>            | 0         | 0         | 0            | 0                             |
|                                 | <i>O. rufipogon_AA</i>         | 0         | 0         | 0            | 0                             |
|                                 | <i>O. glaberrima_AA</i>        | 0.0276    | 0.0013    | 0.05         | 2.1                           |
|                                 | <i>O. punctata_BB</i>          | 0.1013    | 0.0122    | 0.12         | 7.8                           |
|                                 | <i>O. officinalis_CC</i>       | 0.117     | 0.0109    | 0.09         | 9                             |
|                                 | <i>O. australiensis_EE</i>     | 0.1276    | 0.0136    | 0.11         | 9.8                           |
|                                 | <i>O. brachyantha_FF</i>       | 0.2284    | 0.0275    | 0.12         | 17.6                          |
|                                 | <i>O. granulata_GG</i>         | 0.3624    | 0.0285    | 0.08         | 27.9                          |
| <i>RZ53</i> (J7)                | <i>O. sativa_indica_AA</i>     | 0         | 0         | 0            | 0                             |
|                                 | <i>O. nivara_AA</i>            | 0         | 0         | 0            | 0                             |
|                                 | <i>O. rufipogon_AA</i>         | 0         | 0         | 0            | 0                             |
|                                 | <i>O. glaberrima_AA</i>        | 0.0484    | 0.0192    | 0.4          | 3.7                           |
|                                 | <i>O. punctata_BB</i>          | 0.1521    | 0.0664    | 0.44         | 11.7                          |
|                                 | <i>O. officinalis_CC</i>       | 0.1256    | 0.0732    | 0.58         | 9.7                           |
|                                 | <i>O. australiensis_EE</i>     | 0.4961    | 0.0807    | 0.16         | 38.2                          |
|                                 | <i>O. brachyantha_FF</i>       | 0.1777    | 0.1246    | 0.7          | 13.7                          |
|                                 | <i>O. granulata_GG</i>         | 0.4556    | 0.1596    | 0.35         | 35                            |
| <i>Peroxidase_japonica</i> (J8) | <i>O. sativa_indica_AA</i>     | 0.0042    | 0.0029    | 0.69         | 0.3                           |
|                                 | <i>O. nivara_AA</i>            | 0         | 0         | 0            | 0                             |
|                                 | <i>O. rufipogon_AA</i>         | 0         | 0         | 0            | 0                             |
|                                 | <i>O. glaberrima_AA</i>        | 0         | 0.0014    | 0            | 0                             |
|                                 | <i>O. punctata_BB</i>          | 0.063     | 0.0169    | 0.27         | 4.8                           |

|                                 |                            |         |         |        |      |
|---------------------------------|----------------------------|---------|---------|--------|------|
|                                 | <i>O. officinalis_CC</i>   | 0.1037  | 0.0141  | 0.14   | 8    |
|                                 | <i>O. australiensis_EE</i> | 0.0788  | 0.0205  | 0.26   | 6.1  |
|                                 | <i>O. brachyantha_FF</i>   | 0.18    | 0.0481  | 0.27   | 13.8 |
|                                 | <i>O. granulata_GG</i>     | 0.1403  | 0.0524  | 0.37   | 10.8 |
| <i>NifS_Exon2_japonica</i> (J9) | <i>O. sativa_indica_AA</i> | 0       | 0       | 0      | 0.3  |
|                                 | <i>O. nivara_AA</i>        | 0       | 0       | 0      | 0    |
|                                 | <i>O. rufipogon_AA</i>     | 0       | 0       | 0      | 0    |
|                                 | <i>O. glaberrima_AA</i>    | 0.022   | 0.0027  | 0.12   | 1.7  |
|                                 | <i>O. punctata_BB</i>      | 0.0567  | 0.0242  | 0.43   | 4.4  |
|                                 | <i>O. officinalis_CC</i>   | 0.0766  | 0.0284  | 0.37   | 5.9  |
|                                 | <i>O. australiensis_EE</i> | 0.087   | 0.0401  | 0.46   | 6.7  |
|                                 | <i>O. brachyantha_FF</i>   | 0.1869  | 0.0999  | 0.53   | 14.4 |
|                                 | <i>O. granulata_GG</i>     | 0.1403  | 0.081   | 0.58   | 10.8 |
| <i>PIK_japonica</i> (J10)       | <i>O. sativa_indica_AA</i> | 0.0023  | 0.0017  | 0.74   | 0.2  |
|                                 | <i>O. nivara_AA</i>        | 0.0014  | 0.0016  | 1.14   | 0.1  |
|                                 | <i>O. rufipogon_AA</i>     | 0.0014  | 0.0016  | 1.14   | 0.1  |
|                                 | <i>O. glaberrima_AA</i>    | 0.0039  | 0.0017  | 0.44   | 0.3  |
|                                 | <i>O. punctata_BB</i>      | 0.0753  | 0.007   | 0.09   | 5.8  |
|                                 | <i>O. officinalis_CC</i>   | 0.069   | 0.0066  | 0.1    | 5.3  |
|                                 | <i>O. australiensis_EE</i> | 0.0823  | 0.0086  | 0.1    | 6.3  |
|                                 | <i>O. brachyantha_FF</i>   | 0.19190 | 0.02380 | 0.1241 | 14.8 |
|                                 | <i>O. granulata_GG</i>     | 0.1824  | 0.0306  | 0.17   | 14   |

\* estimated using synonymous substitution rate of *Adh1* from grasses (Gaut et al, 1999)

**Supplemental Table 6.** Molecular Divergence Times of Individual *Oryza* Species using four *OsAdh1*Refseq Core Genes to Derive an Approximate Molecular Clock.

|                                                               | Gene                                   | <i>O. sativa</i><br>ssp. <i>indica</i><br>(AA) | <i>O.</i><br><i>nivara</i><br>(AA) | <i>O.</i><br><i>rufipogon</i><br>(AA) | <i>O.</i><br><i>glaberrima</i><br>(AA) | <i>O.</i><br><i>punctata</i><br>(BB) | <i>O.</i><br><i>officinalis</i><br>(CC) | <i>O.</i><br><i>australinesis</i><br>(EE) | <i>O.</i><br><i>brachyantha</i><br>(FF) | <i>O.</i><br><i>granulata</i><br>(GG) |
|---------------------------------------------------------------|----------------------------------------|------------------------------------------------|------------------------------------|---------------------------------------|----------------------------------------|--------------------------------------|-----------------------------------------|-------------------------------------------|-----------------------------------------|---------------------------------------|
| <b><i>O. sativa</i><br/>ssp.<br/><i>japonica</i><br/>(AA)</b> | <i>Adh1</i>                            | 0.0                                            | 0.0                                | 0.0                                   | 0.3                                    | 8.1                                  | 11.2                                    | 10.8                                      | 15.5                                    | 17.0                                  |
|                                                               | <i>NifS (EX2)</i>                      | 0.3                                            | 0.0                                | 0.0                                   | 1.7                                    | 4.4                                  | 5.9                                     | 6.7                                       | 14.4                                    | 10.8                                  |
|                                                               | <i>Peroxidase</i>                      | 0.3                                            | 0.0                                | 0.0                                   | 0.0                                    | 4.8                                  | 8.0                                     | 6.1                                       | 13.8                                    | 10.8                                  |
|                                                               | <i>PIK</i>                             | 0.2                                            | 0.1                                | 0.1                                   | 0.3                                    | 5.79                                 | 5.3                                     | 6.3                                       | 14.8                                    | 14.0                                  |
|                                                               | Average<br>divergence<br>time (in MYA) | 0.27                                           | 0.10*                              | 0.10*                                 | 0.58                                   | 5.76                                 | 7.60                                    | 7.49                                      | 14.62                                   | 13.17                                 |

\*molecular divergence time estimated for *O. nivara* and *O. rufipogon* is from a single gene.

**Supplemental Table 7.** Sequence Conservation in Coding and Intergenic Regions Derived from Pair-wise Comparisons Between a “Core” Segment (J6-2—J10 interval) of the *Adh1* Genus-wide Vertical Sequence Dataset.

| Species comparison                   | Genome type | Length of the aligned region in pair wise comparison for 6-2--10 interval |           | Total length sequence in the alignment (L) * (bp) | Total length of conserved sequence in the alignment (H) * (bp) | Percentage of total sequence conserved %C=H/L * | Percentage of total intergenic sequence conserved %I* | Replaced portion in the intergenic region (100-I)* |
|--------------------------------------|-------------|---------------------------------------------------------------------------|-----------|---------------------------------------------------|----------------------------------------------------------------|-------------------------------------------------|-------------------------------------------------------|----------------------------------------------------|
|                                      |             | Aln1 (bp)                                                                 | Aln2 (bp) |                                                   |                                                                |                                                 |                                                       |                                                    |
| <i>O. sativa ssp. indica (93-11)</i> | AA          | 99589                                                                     | 108341    | 207930                                            | 165524                                                         | 82.7                                            | 74                                                    | 26                                                 |
| <i>O. nivara</i>                     | AA          | 101697                                                                    | 93519     | 195216                                            | 169796                                                         | 89.3                                            | 83.3                                                  | 16.7                                               |
| <i>O. rufipogon</i>                  | AA          | 99208                                                                     | 89759     | 188967                                            | 165682                                                         | 89.9                                            | 84.2                                                  | 15.8                                               |
| <i>O. glaberrima</i>                 | AA          | 101697                                                                    | 82153     | 183850                                            | 140436                                                         | 79.4                                            | 71.3                                                  | 28.7                                               |
| <i>O. punctata</i>                   | BB          | 96077                                                                     | 67859     | 163936                                            | 78500                                                          | 43.7                                            | 28.3                                                  | 71.7                                               |
| <i>O. officinalis</i>                | CC          | 147172                                                                    | 135027    | 282199                                            | 118216                                                         | 24.3                                            | 14.7                                                  | 85.3                                               |
| <i>O. australiensis</i>              | EE          | 168972                                                                    | 134149    | 303121                                            | 95732                                                          | 24.4                                            | 12.4                                                  | 87.6                                               |
| <i>O. brachyantha</i>                | FF          | 97309                                                                     | 65845     | 163154                                            | 46802                                                          | 13.2                                            | 4.7                                                   | 95.3                                               |
| <i>O. granulata</i>                  | GG          | 96416                                                                     | 117622    | 214038                                            | 51978                                                          | 12.7                                            | 5.3                                                   | 94.7                                               |

\*estimated as described by Dubcovsky and Dvorak (2007) and as described in methods.

**Supplemental Table 8.** List of Intact LTR Retrotransposons and Solo LTRs; Presence or Absence of TSDs, and Their coordinates.

| Species                            | Type              | No. of intact retro/similarity to known TE | Coordinate                              | Character                        | Size  | Divergence | Insertion time (MYA) |
|------------------------------------|-------------------|--------------------------------------------|-----------------------------------------|----------------------------------|-------|------------|----------------------|
| <i>O. sativa ssp japonica</i> [AA] |                   |                                            |                                         |                                  |       |            |                      |
| intact LTR                         |                   | 6                                          |                                         |                                  |       |            |                      |
|                                    | LTR/ <i>copia</i> | Os3040LTR-COPIAA                           | 5719376-5719647-----<br>5726676-5726932 | TGT---ACA; TSD:<br>TAAAC         | 7557  | 0.02       | 0.96                 |
|                                    | LTR/ <i>copia</i> | Os0076LTR-SZ18                             | 5602680-5603629-----<br>5606488-5607196 | TGT---ATA; TSD: ATATA            | 4423  | 0.04       | 1.40                 |
|                                    | LTR/ <i>copia</i> | Os0282LTR-Copia-D                          | 5530144-5530646-----<br>5535517-5536019 | TGT---ACA; TSD:<br>TTTTG         | 5445  | 0.00       | 0.15                 |
|                                    | LTR/ <i>copia</i> | Os0196LTR-Gypsy-B                          | 5555894-5556595-----<br>5562259-5562960 | TGT---CCA; TSD:<br>GTAAT---CTAAT | 7066  | 0.03       | 1.18                 |
|                                    | LTR/ <i>copia</i> | Os0946LTR                                  | 5701860-5705226-----<br>5707443-5710809 | TGT---ACA; TSD:<br>TTATC         | 8949  | 0.00       | 0.01                 |
|                                    | LTR/ <i>copia</i> | Os0119LTR-RETROSAT2LTR                     | 5482617-5485688-----<br>5491080-5494150 | TGT---ACA; TSD:<br>TTAGC         | 11533 | 0.00       | 0.01                 |
| soloLTR                            |                   | 7                                          |                                         |                                  |       |            |                      |
|                                    | LTR/ <i>gypsy</i> | Os0019LTR-RC1067                           | 5915014-5916510                         | TGT---ACA; TSD:<br>AACTT---AATTT | 1496  |            |                      |
|                                    | LTR/ <i>gypsy</i> | Os0165LTR-SZ31                             | 5771606-5772956                         | TGT---ACA; no TSD                | 1350  |            |                      |
|                                    | LTR/ <i>gypsy</i> | Os0985LTR-Gypsy-B                          | 5371152-5371806                         | TGT---ACA;<br>TSD:GAAAG---GGAAG  | 654   |            |                      |
|                                    | LTR/ <i>gypsy</i> | Os0019LTR-RC1067                           | 5348620-5350129                         | TGT---ACA; TSD:<br>GCCGC         | 1509  |            |                      |
|                                    | LTR/TRIM          | Os0829LTR                                  | 5744466-5745247                         | TGT---ACA; TSD:<br>GACAC         | 781   |            |                      |
|                                    | LTR/TRIM          | Os0281LTR-SZ105                            | 5689552-5689854                         | TGT---TGA; no TSD                | 303   |            |                      |
|                                    | LTR/unknown       | Os0020LTR-BajielLTR                        | 5903378-5904108                         | TGT---ACA; TSD:<br>CGATG         | 730   |            |                      |
| <i>O. sativa ssp indica</i> [AA]   |                   |                                            |                                         |                                  |       |            |                      |
| intact LTR                         |                   | 4                                          |                                         |                                  |       |            |                      |
|                                    | LTR/ <i>gypsy</i> | Os0016LTR-SZ2                              | 178132-179228---189924-<br>191020       | TGT---TCA; TSD:<br>GTGGT         | 12888 | 0.00       | 0.03                 |
|                                    | LTR/ <i>gypsy</i> | Os0030LTR-RIRE2                            | 35349-35789---49314-49754               | TGT---ACA; TSD:<br>CGTAC         | 14405 | 0.00       | 0.09                 |
|                                    | LTR/ <i>copia</i> | Os0083LTR-SZ9LTR                           | 289601-290566---295035-<br>296000       | GT---ACA; no TSD                 | 6397  | 0.01       | 0.28                 |
|                                    | LTR/ <i>copia</i> | Os3040LTR-COPIAA                           | 103258-103511---113698-<br>113969       | TGT---ACA; no TSD                | 7318  | 0.02       | 0.96                 |
| soloLTR                            |                   | 9                                          |                                         |                                  |       |            |                      |
|                                    | LTR/ <i>gypsy</i> | Os0200LTR-SZ107                            | 126039-129790                           | TGT---ACA; TSD:AATAG             | 3751  |            |                      |
|                                    | LTR/ <i>gypsy</i> | Os0119LTR-RETROSAT2                        | 106534-109673                           | TGT---ACA; TSD:<br>ATTCC         | 3139  |            |                      |
|                                    | LTR/ <i>gypsy</i> | Os0139LTR-SZ106                            | 76959-83963                             | TGT---ACA; TSD:<br>ACAGC         | 3964  |            |                      |
|                                    | LTR/ <i>gypsy</i> | Os0376LTR-SZ102                            | 77992-81032                             | TAT---ACA; TSD:<br>CAACC         | 3040  |            |                      |
|                                    | LTR/ <i>gypsy</i> | Os0419LTR-SZ                               | 12605-13793                             | TGT---TCA; TSD:<br>GTGTG         | 1188  |            |                      |
|                                    | LTR/ <i>copia</i> | Os0076LTR-SZ18                             | 238915-239610                           | TGT---GCA; TSD:<br>ATATA         | 695   |            |                      |
|                                    | LTR/ <i>copia</i> | Os0245LTR-SC-25                            | 76391-84181                             | TGT---ACA; TSD:<br>GACAC         | 786   |            |                      |
|                                    | LTR/ <i>copia</i> | Os0101LTR-SZ25                             | 6078-6408                               | TGA---ACA; TSD:<br>GCTTA-ACTTA   | 330   |            |                      |
|                                    | LTR/TRIM          | Os0281LTR-SZ105                            | 132964-133268                           | TCA---ACA; no TSD                | 305   |            |                      |
| <i>O. nivara</i> [AA]              |                   |                                            |                                         |                                  |       |            |                      |
| intact LTR                         |                   | 1                                          |                                         |                                  |       |            |                      |
|                                    | LTR/ <i>copia</i> | Os0988LTR-Copia                            | 7377-7630---14672-14943                 | TGT---ACA; no TSD                | 7566  | 0.03       | 1.12                 |
| soloLTR                            |                   | 3                                          |                                         |                                  |       |            |                      |
|                                    | LTR/ <i>gypsy</i> | Os0264LTR-SZ101                            | 26996-30736                             | TGT---ACA; TSD:<br>AATAG         | 3740  |            |                      |
|                                    | LTR/TRIM          | Os0281LTR-SZ105                            | 33902-34206                             | TGT---ACA; no TSD                | 305   |            |                      |
|                                    | LTR/ <i>copia</i> | Os0076LTR-SZ18                             | 129869-130564                           | TGT---GCA; TSD:<br>ATATA         | 696   |            |                      |

|                                             |                   |                               |                                                  |                                  |       |      |      |  |
|---------------------------------------------|-------------------|-------------------------------|--------------------------------------------------|----------------------------------|-------|------|------|--|
| <i>O. rufipogon</i> [AA]                    |                   |                               |                                                  |                                  |       |      |      |  |
| intact LTR                                  |                   | 1                             |                                                  |                                  |       |      |      |  |
|                                             | LTR/ <i>copia</i> | Os0988LTR-Copia               | 3676-3929---10970-11241                          | TGT---ACA; no TSD                | 7565  | 0.03 | 1.12 |  |
| soloLTR                                     |                   | 3                             |                                                  |                                  |       |      |      |  |
|                                             | LTR/ <i>gypsy</i> | Os0264LTR-SZ101               | 23296-27037                                      | TGT---ACA; TSD:<br>AATAG         | 3741  |      |      |  |
|                                             | LTR/TRIM          | Os0281LTR-SZ105               | 30203-30507                                      | TGT---TGA; no TSD                | 305   |      |      |  |
|                                             | LTR/ <i>copia</i> | Os0076LTR-SZ18                | 126181-126876                                    | TGT---GCA; TSD:<br>ATATA         | 696   |      |      |  |
| <hr/>                                       |                   |                               |                                                  |                                  |       |      |      |  |
| <i>O. glaberrima</i> [AA]                   |                   |                               |                                                  |                                  |       |      |      |  |
| soloLTR                                     |                   | 2                             |                                                  |                                  |       |      |      |  |
|                                             | LTR/ <i>copia</i> | Os0076LTR-SZ18                | 113579-114291                                    | TGT---ACA; TSD:<br>ATATA         | 712   |      |      |  |
|                                             | LTR/TRIM          | Os0281LTR-SZ105               | 21864-22167                                      | TCA---ACA; no TSD                | 304   |      |      |  |
| <hr/>                                       |                   |                               |                                                  |                                  |       |      |      |  |
| <i>O. punctata</i> [BB]                     |                   |                               |                                                  |                                  |       |      |      |  |
| intact LTR                                  |                   | 1                             |                                                  |                                  |       |      |      |  |
|                                             | LTR/unknown       | Os0173LTR-Dasheng             | 87956-88392---94504-94729;<br>2nd LTR incomplete | TGT---ACA; TSD:<br>CATTG         | 6773  | 0.03 | 1.05 |  |
| soloLTR                                     |                   | 9                             |                                                  |                                  |       |      |      |  |
|                                             | LTR/ <i>gypsy</i> | Os0119LTR/Os0329LTR-<br>RETRO | 73379-78257                                      | TGG---ACA; no TSD                | 2682  |      |      |  |
|                                             | LTR/ <i>gypsy</i> | Os3344LTR-SZ7                 | 117595- 118406                                   | TGT---GCA; TSD:<br>CATGG-CCTGG   | 811   |      |      |  |
|                                             | LTR/ <i>gypsy</i> | Os3312LTR-Osr31               | 104433-108315                                    | TGA---TCA; TSD:<br>AGCTC         | 3589  |      |      |  |
|                                             | LTR/ <i>copia</i> | Os0176LTR-SZ37                | 17061-18529                                      | TGA---ACA; TSD:<br>CTCTC         | 1468  |      |      |  |
|                                             | LTR/ <i>copia</i> | Os0176LTR-SZ37                | 18641-20186                                      | TGT---TCA; no TSD                | 1545  |      |      |  |
|                                             | LTR/ <i>copia</i> | Os3340LTR-SZ61                | 75929-78125                                      | TGA---TCA; TSD:<br>AAGAC         | 2196  |      |      |  |
|                                             | LTR/ <i>copia</i> | Os0253LTR-SZ13L               | 79225-82255                                      | TGA---CCA; TSD:<br>ACCAC         | 1560  |      |      |  |
|                                             | LTR/unknown       | Os0310LTR-SZ29                | 80568-82037                                      | TGT---ATA; TSD:<br>CTAGT         | 1469  |      |      |  |
|                                             | LTR/unknown       | Os1002LTR                     | 107127-107419                                    | TGT---CCA; no TSD                | 292   |      |      |  |
| <hr/>                                       |                   |                               |                                                  |                                  |       |      |      |  |
| <i>O. officinalis</i> [CC]                  |                   |                               |                                                  |                                  |       |      |      |  |
| soloLTR                                     |                   | 2                             |                                                  |                                  |       |      |      |  |
|                                             | LTR/ <i>gypsy</i> | Os0077LTR-SZ35                | 56805-59859                                      | TGT---ACA; TSD:<br>TGAGG         | 3054  |      |      |  |
|                                             | LTR/ <i>Gypsy</i> | Os0046LTR-SZ45                | 3848-5266                                        | TGT---ACA; TSD:<br>CCGTT         | 1418  |      |      |  |
| <hr/>                                       |                   |                               |                                                  |                                  |       |      |      |  |
| <i>O. australiensis</i> -OA_CBa0016E12 [EE] |                   |                               |                                                  |                                  |       |      |      |  |
| intact LTR                                  |                   | 2                             |                                                  |                                  |       |      |      |  |
|                                             | LTR/ <i>copia</i> | Os0195LTR-RIRE1               | 130500-132054---146421-<br>147992                | TGA---ACA; TSD:<br>CCAAC         | 13078 | 0.02 | 0.60 |  |
|                                             | LTR/unknown       | Os0030TR-RIRE2                | 207744-208224---218988-<br>219295                | TGT---TCA; TSD:<br>GTTTG         | 11551 | 0.01 | 0.50 |  |
| soloLTR                                     |                   | 5                             |                                                  |                                  |       |      |      |  |
|                                             | LTR/ <i>gypsy</i> | Os0019LTR-RC1067              | 185392-186946                                    | TCT---ACA; no TSD                | 1582  |      |      |  |
|                                             | LTR/ <i>gypsy</i> | Os0240LTR-Gypsy-A             | 136672-139913                                    | TGT---ACA; TSD:<br>ACATC         | 3241  |      |      |  |
|                                             | LTR/ <i>copia</i> | Os0195LTR-RIRE1               | 150980-152618                                    | TGT---TCA; TSD:<br>GATGT         | 1638  |      |      |  |
|                                             | LTR/ <i>copia</i> | Os0195LTR-RIRE1               | 86985-88503                                      | TGA---ACA; TSD:<br>GGCTT         | 1578  |      |      |  |
|                                             | LTR/unknown       | Os0310LTR-SZ29                | 19751-21302                                      | TGT---ACA; no TSD                | 727   |      |      |  |
| <hr/>                                       |                   |                               |                                                  |                                  |       |      |      |  |
| <i>O. australiensis</i> -OA_CBa0062H21 [EE] |                   |                               |                                                  |                                  |       |      |      |  |
| intact LTR                                  |                   | 9                             |                                                  |                                  |       |      |      |  |
|                                             | LTR/ <i>gypsy</i> | Os0019LTR-RC1067              | 94-1529---35712-37154                            | TGT---ACA; TSD:<br>CATAT---TATAT | 13419 | 0.08 | 3.06 |  |
|                                             | LTR/ <i>gypsy</i> | Os0019LTR-RC1067              | 2450-3943---24621-26091                          | TGT---ACA; TSD:<br>GCGGC---ACGGC | 13511 | 0.05 | 1.96 |  |
|                                             | LTR/ <i>copia</i> | Os1031LTR-SZ5                 | 67194-68287---71866-72960                        | TGT---ACA; TSD:<br>CGGTA         | 5766  | 0.01 | 0.28 |  |
|                                             | LTR/ <i>copia</i> | Os0195LTR-RIRE1               | 81917-83098---87957-89144                        | GGG---AAA; no TSD                | 7227  | 0.03 | 1.17 |  |
|                                             | LTR/ <i>copia</i> | Os0008LTR-SZ5                 | 109209-110200---114096-                          | TGT---ACA; TSD:                  | 5765  | 0.09 | 3.60 |  |

|                            |             |                     |                               |                               |       |      |       |
|----------------------------|-------------|---------------------|-------------------------------|-------------------------------|-------|------|-------|
|                            |             |                     | 114974                        | CAGAT                         |       |      |       |
|                            | LTR/copia   | Os1031LTR-SZ5       | 118710-119918---124414-125629 | TGT---AGA; TSD: GTTGT         | 6919  | 0.07 | 2.69  |
|                            | LTR/copia   | Os0156LTR-SC-3      | 130734-131052---136068-136414 | TGA---ACA; no TSD             | 5680  | 0.02 | 0.61  |
|                            | LTR/unknown | Os0173LTR-Dasheng   | 7599-8044---17285-17729       | TGT---ACA; TSD: ATAAA         | 10130 | 0.02 | 0.70  |
|                            | LTR/unknown | Os0173LTR-Dasheng   | 54656-55126---58265-58735     | TGT---ACA; TSD: TATTT         | 4079  | 0.01 | 0.33  |
| soloLTR                    |             | 9                   |                               |                               |       |      |       |
|                            | LTR/gypsy   | Os0119LTR-RETROSAT2 | 41710-44559                   | TGT---ACA; TSD: GCCGA---GCCGG | 2849  |      |       |
|                            | LTR/gypsy   | Os1082LTR           | 165134-166603                 | TGT---ACA; no TSD             | 1469  |      |       |
|                            | LTR/gypsy   | Os0264LTR-SZ101     | 167201-170714                 | TGT---ACA; TSD: TCAGA         | 3513  |      |       |
|                            | LTR/gypsy   | Os0391LTR-RCS1      | 185155-186036                 | TGA---TCA; TSD: GTCTT         | 881   |      |       |
|                            | LTR/gypsy   | Os0019LTR-RC1067    | 194135-195612                 | TGT---ACA; TSD: ACCAT         | 1477  |      |       |
|                            | LTR/gypsy   | Os0019LTR-RC1067    | 200497-201966                 | TGT---ACA; TSD: CCAGG         | 853   |      |       |
|                            | LTR/copia   | Os1031LTR-SZ5       | 77199-78384                   | TGT---ACA; TSD: TATCA         | 1185  |      |       |
|                            | LTR/copia   | Os0356LTR-SZ27      | 127062-127329                 | TGT---ACA; no TSD             | 267   |      |       |
|                            | LTR/copia   | Os0008LTR-SZ5       | 163983-170904                 | TGT---AC; no TSD              | 1173  |      |       |
| <hr/>                      |             |                     |                               |                               |       |      |       |
| <i>O. brachyantha</i> [FF] |             |                     |                               |                               |       |      |       |
| intact LTR                 |             | 1                   |                               |                               |       |      |       |
|                            | LTR/copia   | Os0356LTR-SZ27      | 80879-81164---85462-85773     | TGT---ACA; TSD: TTCCC---TTCTC | 4894  | 0.07 | 2.85  |
| soloLTR                    |             | 6                   |                               |                               |       |      |       |
|                            | LTR/copia   | Os0171LTR-SZ30      | 1345-2266                     | TGT---AGA; no TSD             | 921   |      |       |
|                            | LTR/copia   | Os0356LTR-SZ27      | 9297-9619                     | TGT---ACA; TSD: GAGCC---GGGCC | 322   |      |       |
|                            | LTR/copia   | Os1031LTR-SZ5       | 26842-27967                   | TGT---ACA; TSD: GAAAG         | 990   |      |       |
|                            | LTR/TRIM    | Os0281LTR-SZ105     | 32409-32683                   | TGT---ACA; TSD: AGATA         | 274   |      |       |
|                            | LTR/unknown | Os0173LTR-Dasheng   | 135326-135740                 | TGT---ATA; TSD: ACTTG         | 414   |      |       |
|                            | LTR/unknown | Os0173LTR-Dasheng   | 198005-198435                 | TGT---ACA; TSD: AATAT---AATAA | 430   |      |       |
| <hr/>                      |             |                     |                               |                               |       |      |       |
| <i>O. granulata</i> [GG]   |             |                     |                               |                               |       |      |       |
| intact LTR                 |             | 10                  |                               |                               |       |      |       |
|                            | LTR/gypsy   | Os0419              | 21361-22381---28431-29450     | TGT---ACA; TSD: ACAGG         | 8089  | 0.01 | 0.46  |
|                            | LTR/gypsy   | Os0077              | 101014-103624---108677-111176 | TGT---ACA; TSD: CATGG         | 10162 | 0.00 | 0.11  |
|                            | LTR/gypsy   | Os1082              | 269476-270813---279364-280701 | TGT---ACA; TSD: GAGCC         | 11225 | 0.04 | 1.48  |
|                            | LTR/copia   | Os1036              | 50920-51314---52315-52712     | TGT---ACA; TSD: GTATT---TTATT | 1792  | 0.26 | 10.03 |
|                            | LTR/copia   | Os0466              | 67399-68612---74228-75085     | TGA---TCA; TSD: ACTGC         | 5110  | 0.02 | 0.85  |
|                            | LTR/copia   | Os0176              | 120771-122317---131064-132601 | TGT---TTA; TSD: GCCTC         | 11830 | 0.07 | 2.59  |
|                            | LTR/copia   | Os1214              | 235696-236091---240863-241258 | TGT---ACA; TSD: ATCTT         | 5562  | 0.01 | 0.49  |
|                            | LTR/unknown | Os0173              | 136217-136635---150503-150919 | TGG---ACA; no TSD             | 13566 | 0.17 | 6.40  |
|                            | LTR/unknown | Os0173              | 227698-228132---231883-232310 | TGT---ACA; TSD: ATCGG         | 4612  | 0.05 | 1.98  |
|                            | LTR/unknown | Os0972              | 184097-184526---188667-189097 | TGT---ACA; TSD: CCACT         | 5000  | 0.11 | 4.04  |
| soloLTR                    |             | 5                   |                               |                               |       |      |       |
|                            | LTR/gypsy   | Os0141              | 264977-268099                 | TGT---ACA; TSD: GTACA---GTAGA | 3122  |      |       |
|                            | LTR/gypsy   | Os1082              | 75760-78470                   | TGG---ACA; no TSD             | 2710  |      |       |
|                            | LTR/gypsy   | Os0119              | 218445-221617                 | TGT---ACA; no TSD             | 3172  |      |       |
|                            | LTR/copia   | Os0171              | 147928-148683                 | TGT---ACA; TSD: TACCT         | 755   |      |       |
|                            | LTR/copia   | Os0984              | 13767-15515                   | TGT---ATA; TSD: GCCGC         | 399   |      |       |

**Supplemental Table 9.** Summary of Comparisons of the Number of Shared and Unshared Genes in the across the *Adh1* Genus-wide Vertical Sequence Dataset.

| Species comparison            | Total genes | Unshared genes | % of unshared genes |
|-------------------------------|-------------|----------------|---------------------|
| <i>japonica-indica</i>        | 37          | 3              | 8.1                 |
| <i>japonica-nivara</i>        | 39          | 1              | 2.6                 |
| <i>japonica-rufipogon</i>     | 25          | 1              | 4.0                 |
| <i>japonica-glaberrima</i>    | 24          | 2              | 8.3                 |
| <i>japonica-punctata</i>      | 25          | 7              | 28.0                |
| <i>japonica-officinalis</i>   | 25          | 3              | 12.0                |
| <i>japonica-australiensis</i> | 51          | 19             | 37.3                |
| <i>japonica-brachyantha</i>   | 56          | 28             | 50.0                |
| <i>japonica-granulata</i>     | 46          | 34             | 73.9                |



**Supplemental Table 10.** List of Shared or Unshared Genes or Gene Families Across the *Adh1* Genus-wide Vertical Sequence Dataset.

| gene/<br>gene<br>family# | Gene family name         | Species |    |    |    |    |    |    |    |    |    |  |
|--------------------------|--------------------------|---------|----|----|----|----|----|----|----|----|----|--|
|                          |                          | J       | I  | N  | R  | G  | P  | O  | A  | B  | GR |  |
| 1                        | UP1 protease             | √       | ND | ND | ND | ND | ND | ND | √  | ND | ND |  |
| 2                        | NBS-LRR                  | √       | √  | ND | ND | ND | ND | √  | χ  | √  | χ* |  |
| 3                        | serine carboxy peptidase | √       | ND | ND | ND | ND | ND | ND | √  | χ  | ND |  |
| 4                        | tetratricopeptide        | √       | ND | ND | ND | ND | ND | ND | √  | χ  | ND |  |
| 5                        | protein kinase           | √       | ND | ND | ND | ND | ND | ND | √  | √  | χ* |  |
| Core                     | Adh                      | √       | √  | √  | √  | √  | √  | √  | √  | √  | √  |  |
|                          | RZ53                     | √       | √  | √  | √  | √  | √  | √  | √  | √  | √  |  |
|                          | peroxidase               | √       | √  | √  | √  | √  | √  | √  | √  | √  | √  |  |
|                          | NifS                     | √       | √  | √  | √  | √  | √  | √  | √  | √  | √  |  |
|                          | PIK                      | √       | √  | √  | √  | √  | √  | √  | √  | √  | √  |  |
| 11                       | F-box                    | √       | √  | √  | √  | √  | √  | √  | √  | √  | χ  |  |
| 12                       | LRRkinase/<br>PACKMULE   | √       | √  | √  | √  | ND | χ  | ND | χ  | χ  | χ  |  |
| 13                       | SRKinase                 | √       | √  | √  | ND | ND | √  | ND | √  | χ* | χ* |  |
| 14                       | FMO                      | √       | ND | √  | χ  |  |
| 15                       | MYB                      | √       | ND | √  | χ  |  |
| 16                       | unknown                  | √       | ND | χ  |  |
| 17                       | MAP kinase               | √       | ND | χ  |  |
| 18                       | SEU3                     | √       | ND | χ  |  |
| 19                       | alpha-G-protein          | √       | ND | χ  |  |
| 20                       | mTERF                    | √       | ND | ND | ND | ND | ND | ND | √  | ND | √  |  |

J = *japonica*, I = *indica*, N = *O. nivara*, R = *O. rufipogon*, G = *O. glaberrima*, P = *O. punctata*, O = *O. officinalis*, A = *O. australiensis*, B = *O. brachyantha* and GR = *O. granulata*.

# Presence or absence of individual gene or whole gene families (*O. sativa* ssp *japonica* reference sequence) is indicated. A detailed description of the presence or absence of each individual family member(s) are indicated in the Figure 1.

ND = not determined because of lack of sequence coverage

√ = present

χ = absent

\* Present but no phylogenetic relationship because of sequence divergence

**Supplemental Table 11.** Summary of Intact LTR Retrotransposons and Solo LTRs Based on the Presence or Absence of Target Site Duplications (TSD).

| Status of Retrotransposon   | Total No. | %    |
|-----------------------------|-----------|------|
| Intact Element with TSDs    | 28        | 80   |
| Intact Element without TSDs | 7         | 20   |
| soloLTR with TSDs           | 43        | 71.7 |
| soloLTR without TSDs        | 17        | 28.3 |

**Supplemental Table 12.** Detailed Breakdown of Intact LTR Retrotransposons and Solo LTRs Based on the Presence or Absence of Target Site Duplications.

| Status of Retrotransposon   | <i>Oryza species</i> |     |                    |    |               |     |                  |     |                   |   |                 |     |                    |   |                        |     |                        |      |                    |     |                  |    |
|-----------------------------|----------------------|-----|--------------------|----|---------------|-----|------------------|-----|-------------------|---|-----------------|-----|--------------------|---|------------------------|-----|------------------------|------|--------------------|-----|------------------|----|
|                             | <i>ssp. japonica</i> |     | <i>ssp. indica</i> |    | <i>nivara</i> |     | <i>rufipogon</i> |     | <i>glaberrima</i> |   | <i>punctata</i> |     | <i>officinalis</i> |   | <i>australiensis-1</i> |     | <i>australiensis-2</i> |      | <i>brachyantha</i> |     | <i>granulata</i> |    |
|                             | No.                  | %   | No.                | %  | No.           | %   | No.              | %   | No.               | % | No.             | %   | No.                | % | No.                    | %   | No.                    | %    | No.                | %   | No.              | %  |
| Intact Element with TSDs    | 6                    | 100 | 2                  | 50 | 0             | 0   | 0                | 0   | 0                 | 0 | 1               | 100 | 0                  | 0 | 2                      | 100 | 7                      | 77.8 | 1                  | 100 | 9                | 90 |
| Intact Element without TSDs | 0                    | 0   | 2                  | 50 | 1             | 100 | 1                | 100 | 0                 | 0 | 0               | 0   | 0                  | 0 | 0                      | 0   | 2                      | 22.2 | 0                  | 0   | 1                | 10 |

**Supplemental Table 13.** Molecular Timing of Various Duplication Events.

a). Molecular Timing of Duplication for Gene Family #13 in *ssp. japonica*

| Seq1     | Seq2     | SynDif | SynPos | Ks     | NSynDif | NSynPos | Ka     | Ka/Ks  | Mol. clock |
|----------|----------|--------|--------|--------|---------|---------|--------|--------|------------|
| 13-1_JAP | 13-1_IND | 1      | 163.33 | 0.0061 | 1       | 523.67  | 0.0019 | 0.3115 | 0.47       |
| 13-1_JAP | 13-2_JAP | 39.83  | 161.58 | 0.2989 | 35.17   | 525.42  | 0.0701 | 0.2345 | 23         |
| 13-1_JAP | 13-3_JAP | 53     | 164.42 | 0.4213 | 55      | 522.58  | 0.1134 | 0.2692 | 32.4       |
| 13-2_JAP | 13-3_JAP | 52.33  | 162.67 | 0.4202 | 59.67   | 524.33  | 0.1234 | 0.2937 | 32.3       |

b). Molecular Timing of Duplication for Gene Family #6 in *ssp. japonica*

| Seq1         | Seq2         | SynDif | SynPos | Ks     | NSynDif | NSynPos | Ka    | ka/ks | Mol. clock |
|--------------|--------------|--------|--------|--------|---------|---------|-------|-------|------------|
| 6-3-japonica | 6-2-Japonica | 120.42 | 268.08 | 0.6852 | 73.58   | 865.92  | 0.090 | 0.132 | 52.71      |
| 6-3-japonica | 6-1-japonica | 151.5  | 269.5  | 1.0383 | 79.5    | 864.5   | 0.098 | 0.094 | 79.87      |
| 6-2-Japonica | 6-1-japonica | 125.17 | 263.25 | 0.7538 | 69.83   | 870.75  | 0.085 | 0.112 | 57.98      |

c). Molecular Timing of Duplication in Gene Family #7 in *O. brachyantha* [BB].

| Seq1 | Seq2 | SynDif | SynPos | Ks     | NSynDif | NSynPos | Ka     | ka/ks    | Mol. clock |
|------|------|--------|--------|--------|---------|---------|--------|----------|------------|
| B7-1 | B7-2 | 10.17  | 46.17  | 0.2607 | 14.83   | 160.83  | 0.0984 | 0.377445 | 20.1       |
